# Supplementary material
Source: PubMed Central journal article supplement (PMC1533783)
Supplement: pnas_0511323103_3.pdf [file pnas_0511323103_3.pdf]

**Table 2. List of strains and plasmids**

| Strain (designation in paper)            | Genotype                                                                                              | Source              |
|------------------------------------------|-------------------------------------------------------------------------------------------------------|---------------------|
| <b>Strains</b>                           |                                                                                                       |                     |
| PAO1 ( <i>P.a.</i> )                     | <i>P.a.</i> wild type                                                                                 | (1)                 |
| 62                                       | <i>P.a.</i> isolated from soil                                                                        | (2)                 |
| E2                                       | <i>P.a.</i> isolated from tomato                                                                      | (2)                 |
| MSH3                                     | <i>P.a.</i> isolated from water                                                                       | (2)                 |
| MSH10                                    | <i>P.a.</i> isolated from water                                                                       | (2)                 |
| PDO100 ( <i>P.a.-rhlI</i> )              | PAO1 $\Delta$ <i>rhlI</i> mutant                                                                      | (1)                 |
| PAO1-JP1 ( <i>P.a.-lasI</i> )            | PAO1 $\Delta$ <i>lasI</i> mutant                                                                      | (1)                 |
| PAO1-JP2 ( <i>P.a.-lasI</i> rhlI)        | PAO1 $\Delta$ <i>lasI</i> $\Delta$ <i>rhlI</i> double mutant                                          | (1)                 |
| <i>lasRrhlR</i> ( <i>P.a.-lasRrhlR</i> ) | PAO1 $\Delta$ <i>lasR</i> $\Delta$ <i>rhlR</i> double mutant                                          | Michael Givskov     |
| AHP4C ( <i>P.a.-hcnC</i> rhlBphzA1)      | PAO1 $\Delta$ <i>hcnC</i> $\Delta$ <i>rhlB</i> $\Delta$ <i>phzA1</i> triple mutant                    | Colin Manoil        |
| PTL32688 ( <i>P.a.-pilA</i> )            | PAO1 type IV pili biosynthesis mutant                                                                 | Univ. of Washington |
| <i>flgK</i> ( <i>P.a.-flgK</i> )         | PAO1 flagellum biosynthesis mutant                                                                    | (3)                 |
| AtC58* ( <i>A.t.</i> )                   | <i>A.t.</i> wild-type AtC58 with GFP Tn7 insertion, Gm <sup>R</sup>                                   | This study          |
| AtC58-fliR ( <i>A.t.-fliR</i> )          | AtC58 flagellum mutant with TnMod-OKm' insertion in <i>fliR</i> , harboring pJZ383 for GFP expression | (4)                 |
| <b>Plasmids</b>                          |                                                                                                       |                     |
| pDA1                                     | pQF50 derivative with <i>rhlR</i> and <i>lasR</i> , Amp <sup>R</sup>                                  | This study          |
| pDA2                                     | pUCP18 derivative with <i>pilA</i> , Amp <sup>R</sup>                                                 | This study          |
| pDA3                                     | pEX1.8 derivative with <i>flgK</i> and <i>flgL</i> , Amp <sup>R</sup>                                 | This study          |

1. Pesci, E., Pearson, J., Seed, P. & Iglewski, B. (1997) *J. Bacteriol.* **179**, 3127–3132.
2. Wolfgang, M. C., Kulasekara, B. R., Liang, X., Boyd, D., Wu, K., Yang, Q., Miyada, C. G. & Lory, S. (2003) *Proc. Natl. Acad. Sci. USA* **100**, 8484–8489.
3. O'Toole, G. A., & Kolter R. (1998) *Mol. Microbiol.* **30**, 295–304.
4. Ramey, B. E. (2004) PhD Dissertation (Indiana Univ., Bloomington, IN).
