# Supplementary material
Source: PubMed Central journal article supplement (PMC1533783)
Supplement: pnas_0511323103_4.pdf [file pnas_0511323103_4.pdf]

**Table 3. Doubling times in 1× AT medium with different carbon sources**

|                       | Succinate, min | Glucose, min | Glutamate, min |
|-----------------------|----------------|--------------|----------------|
| <i>P.a.</i>           | 28.4 ± 0.4     | 35.1 ± 3.0   | 28.0 ± 0.6     |
| <i>P.a.- lasI</i>     | 28.1 ± 0.9     |              |                |
| <i>P.a.- rhII</i>     | 27.4 ± 1.2     |              |                |
| <i>P.a.- lasIrhII</i> | 32.0 ± 2.0     |              |                |
| <i>A.t.</i>           | 59.1 ± 1.6     | 80.1 ± 12.0  | 127.2 ± 22.8   |

SD of three experiments is shown.
