# Supplementary material
Source: PubMed Central journal article supplement (PMC1533783)
Supplement: pnas_0511323103_5.pdf [file pnas_0511323103_5.pdf]

**Table 4. COMSTAT analysis of pure culture biofilms at 164 h**

|                      | Biomass, $\mu\text{m}^3/\mu\text{m}^2$ | Average thickness, $\mu\text{m}$ | Roughness coefficient |
|----------------------|----------------------------------------|----------------------------------|-----------------------|
| <i>P.a.</i>          | $7.0 \pm 1.6$                          | $8.0 \pm 2.0$                    | $0.09 \pm 0.03$       |
| <i>P.a.-lasRrhlR</i> | $6.6 \pm 2.6$                          | $7.2 \pm 3.3$                    | $0.13 \pm 0.02$       |
| <i>P a.-pilA</i>     | $8.8 \pm 2.8$                          | $26.4 \pm 10.4$                  | $0.42 \pm 0.09$       |
| <i>P.a.-flgK</i>     | $5.4 \pm 2.1$                          | $7.0 \pm 2.9$                    | $0.21 \pm 0.06$       |
| <i>A.t.</i>          | $7.1 \pm 2.0$                          | $18.0 \pm 4.5$                   | $0.48 \pm 0.13$       |
| <i>A.t.-fliR</i>     | $6.1 \pm 3.3$                          | $12.7 \pm 6.5$                   | $0.78 \pm 0.13$       |
