# Supplementary material
Source: PubMed Central journal article supplement (PMC1533783)
Supplement: pnas_0511323103_6.pdf [file pnas_0511323103_6.pdf]

**Table 5. COMSTAT analysis of coculture biofilm biomass ( $\mu\text{m}^3/\mu\text{m}^2$ )**

|                                   | <i>P.a.</i> | <i>A.t.</i>   |
|-----------------------------------|-------------|---------------|
| <i>P.a./A.t.</i> (24 h)           | 2.0 ± 0.6   | 0.41 ± 0.15   |
| <i>P.a./A.t.</i> (96 h)           | 3.2 ± 0.4   | 0.23 ± 0.05   |
| <i>P.a./A.t.</i> (164 h)          | 4.2 ± 1.0   | 0.074 ± 0.021 |
| <i>P.a.-lasRrhlR/A.t.</i> (164 h) | 5.3 ± 1.1   | 0.36 ± 0.07   |
| <i>P.a.-pilA/A.t.</i> (164 h)     | 0.95 ± 0.33 | 0.12 ± 0.06   |
| <i>P.a.-flgK/A.t.</i> (164 h)     | 1.7 ± 0.6   | 0.48 ± 0.13   |
| <i>P.a./A.t.-fliR</i> (164h)      | 3.5 ± 0.9   | 0.14 ± 0.06   |
