# Supplementary material
Source: PubMed Central journal article supplement (PMC1533783)

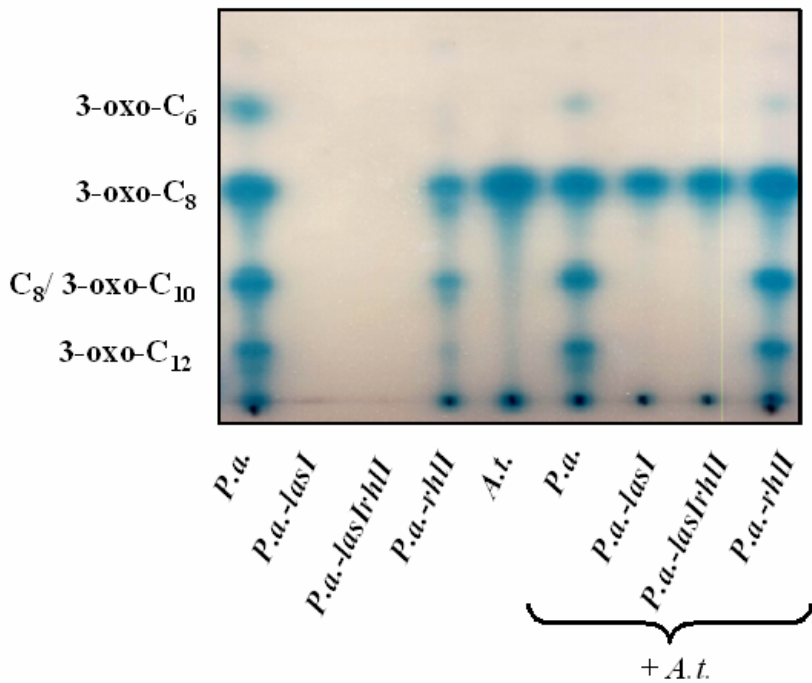

Supplement: pnas_0511323103_1.pdf [file pnas_0511323103_1.pdf]

A. *A.t*

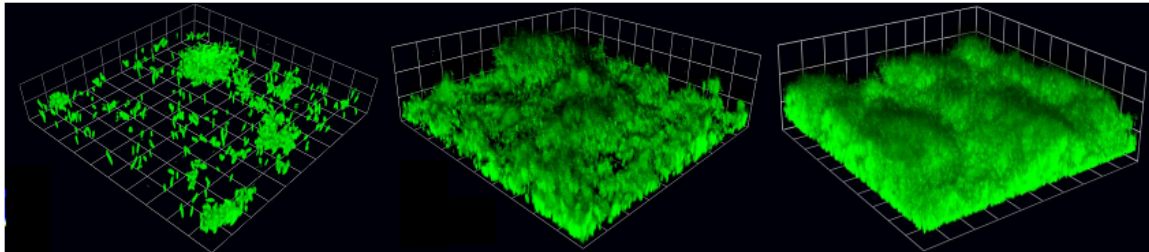

B. *At-flüR*

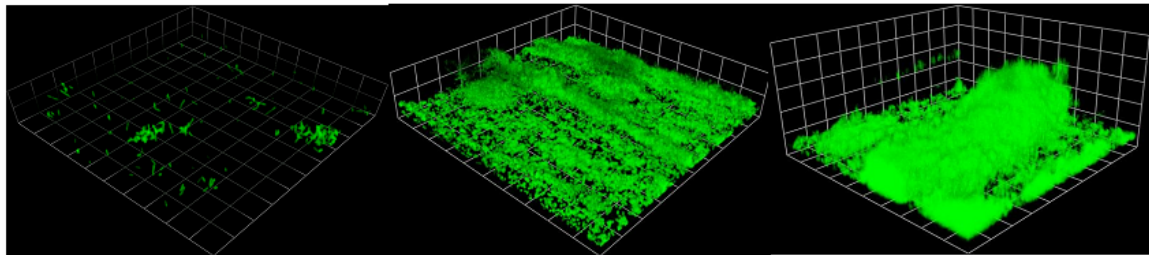

24 h

96 h

164 h

Supplement: pnas_0511323103_2.pdf [file pnas_0511323103_2.pdf]
